# Supplementary material for: Towards an arthritis flare-responsive drug delivery system
Source: Nat Commun. 2018 Apr 3;9:1275. doi: 10.1038/s41467-018-03691-1 (PMC5882944; doi:10.1038/s41467-018-03691-1)
Supplement: Supplementary file 1 — Supplementary Information(PDF 2937 kb) [file 41467_2018_3691_MOESM1_ESM.pdf]

## **Towards an Arthritis Flare-Responsive Drug Delivery System**

Nitin Joshi<sup>1,2,3†</sup>, Jing Yan<sup>3,4†</sup>, Seth Levy<sup>3,4†</sup>, Sachin Bhagchandani<sup>1</sup>, Kai V. Slaughter<sup>1</sup>, Nicholas E. Sherman<sup>1</sup>, Julian Amirault<sup>1</sup>, Yu Feng Wang<sup>1</sup>, Logan Riegel<sup>1</sup>, Xueyin He<sup>1</sup>, Tan Shi Rui<sup>1</sup>, Michael Valic<sup>1</sup>, Praveen K. Vemula<sup>1,2,3,#</sup>, Oscar R. Miranda<sup>1,2,3</sup>, Oren Levy<sup>1,2,3</sup>, Ellen M. Gravalles<sup>5</sup>, Antonios O. Aliprantis<sup>3,4##</sup>, Joerg Ermann<sup>3,4\*</sup>, Jeffrey M. Karp<sup>1,2,3\*</sup>

<sup>1</sup>Center for Nanomedicine and Division of Engineering in Medicine, Department of Medicine, Brigham and Women's Hospital, Boston, MA 02115, USA. <sup>2</sup>Harvard–Massachusetts Institute of Technology Division of Health Sciences and Technology, Cambridge, MA 02139, USA. <sup>3</sup>Harvard Medical School, Boston, MA 02115, USA. <sup>4</sup>Division of Rheumatology, Immunology and Allergy, Brigham and Women's Hospital, Boston, MA 02115, USA. <sup>5</sup>Department of Medicine, Division of Rheumatology, University of Massachusetts Medical School, Worcester, MA 01605. <sup>#</sup>Present affiliation: Institute for Stem Cell Biology and Regenerative Medicine (inStem), UAS-GKVK post, Bellary Road, Bangalore 560065, India. <sup>##</sup>Present affiliation: Merck Research Laboratories, 33 Ave Louis Pasteur Boston, MA 02115, USA. <sup>†</sup>These authors contributed equally to this work. <sup>\*</sup>Correspondence and requests for materials should be addressed to J.M.K. (email: jmkarp@bwh.harvard.edu) and J.E. (email: jermann@bwh.harvard.edu).

## Supplementary Figures

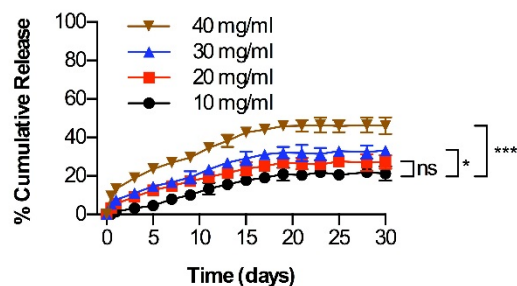

### Supplementary Figure 1: TG-18 hydrogel shows dose-response relationship between TA concentration and its encapsulation stability. *In vitro* release kinetics of TA in PBS (pH 7.4) at 37°C comparing hydrogel formulations generated with same amount of TG-18 (10 % w/v), but loaded with different concentrations of TA.

*In vitro* release kinetics of TA in PBS (pH 7.4) at 37°C comparing hydrogel formulations generated with same amount of TG-18 (10 % w/v), but loaded with different concentrations of TA.

\* $P < 0.05$  and \*\* $P < 0.01$  on day 30.  $P$  values were determined by one-way Anova with Tukey's post hoc analysis.

Data are means  $\pm$  SD for technical repeats ( $n = 3$ , experiment performed at least twice).

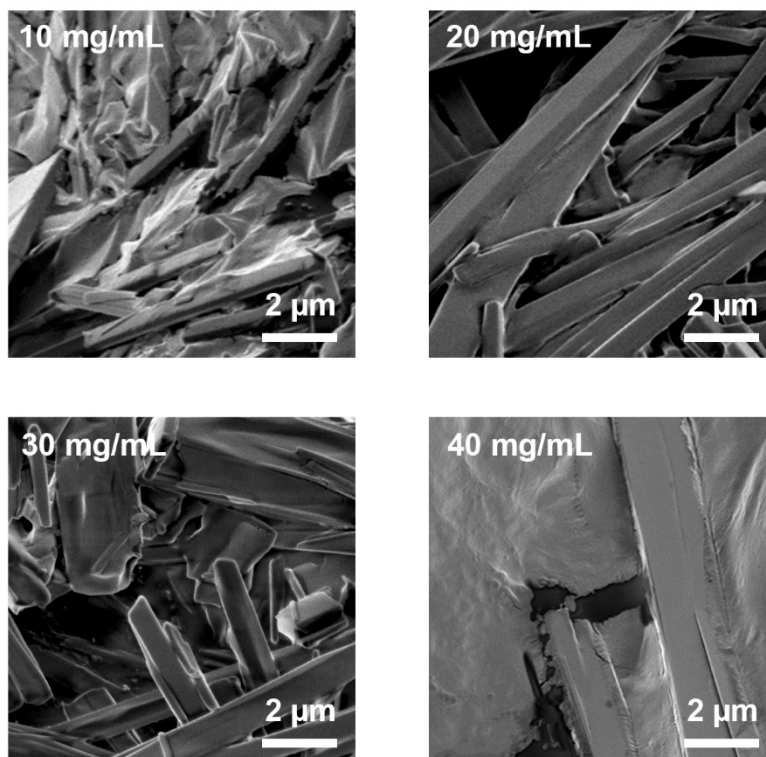

**Supplementary Figure 2: High resolution scanning electron microscopy (HR-SEM) images of TA-loaded TG-18 hydrogels formulated with different TA concentrations. (a) 10 mg/ml; (b) 20 mg/ml; (c) 30 mg/ml and (d) 40 mg/ml.**

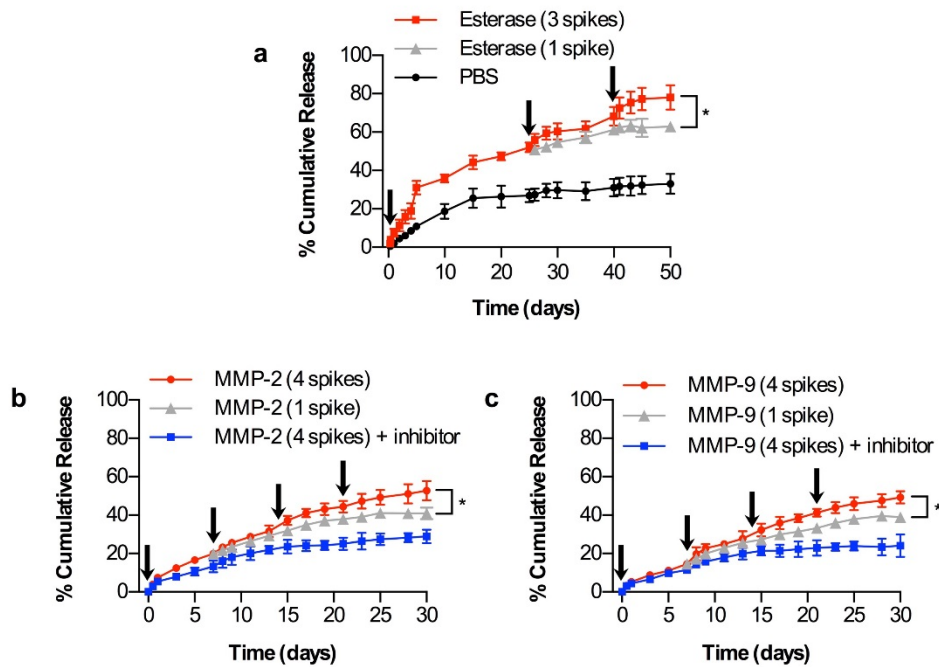

**Supplementary Figure 3: A single pulse of enzyme results in less cumulative release of TA compared to multiple pulses.** *In vitro* release kinetics of TA from TG-18 hydrogel in PBS without or with a single or multiple pulses of enzymes, including **(a)** esterase (200 U/ml), **(b)** MMP-2 (1.5  $\mu\text{g/ml}$ ) and **(c)** MMP-9 (1  $\mu\text{g/ml}$ ). Fresh enzyme or enzyme + inhibitor were added at the indicated time points (arrows). For single pulse based releases, enzyme was added only on day 0. For (a),  $*P < 0.05$  on day 50 and for (b) and (c),  $*P < 0.05$  on day 30. *P* values were determined by Students' *t* test. Data are means  $\pm$  SD for technical repeats ( $n = 3$ , experiment performed at least twice).

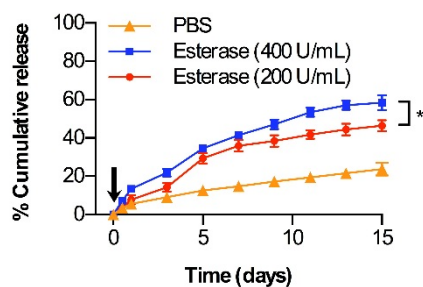

**Supplementary Figure 4: TA-loaded TG-18 hydrogel shows dose-response relationship between enzyme concentration and TA release.** *In vitro* release kinetics of TA from TG-18 hydrogels in PBS without or with different concentrations of esterase (*T. lanuginosus* lipase) ( $*P < 0.05$ ). Enzyme was added at the indicated time

point (arrow). *P* values were determined by one-way Anova with Tukey's post hoc analysis. Data are means  $\pm$  SD for technical repeats ( $n = 3$ , experiment performed at least twice).

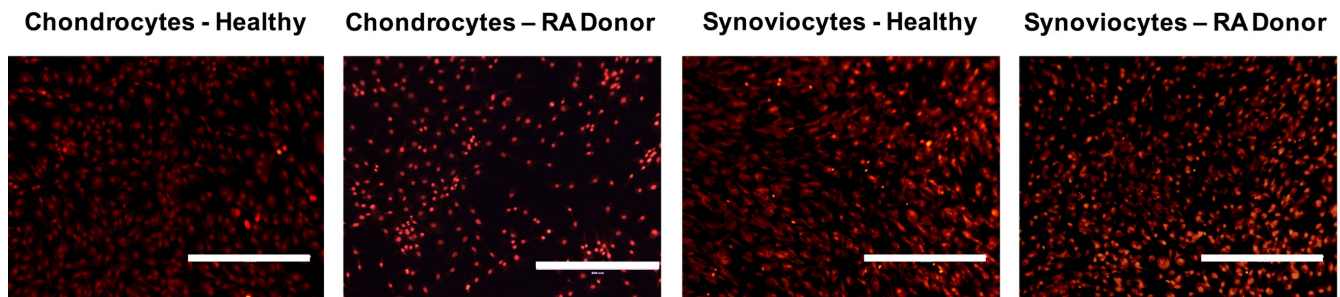

**Supplementary Figure 5:** Representative fluorescence microscopy images from the live/dead assay of control primary human chondrocytes or synoviocytes treated with 70% methanol solution for 30 minutes. Live/dead assay was performed using calcein-AM/ethidium homodimer-1 dye combination. Live cells stain green with the calcein-AM, whereas dead cells stain red with ethidium homodimer-1 (Scale bar: 400  $\mu$ m).

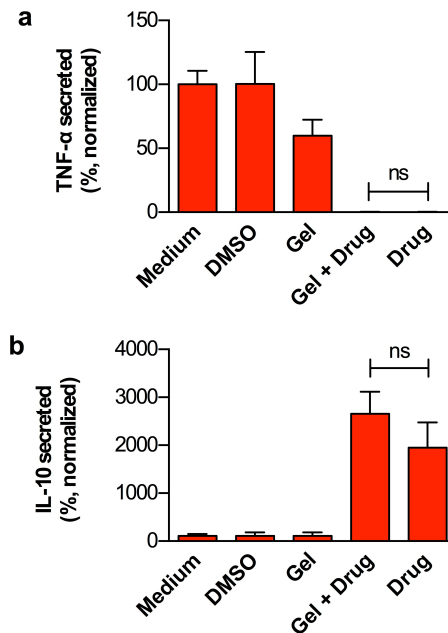

**Supplementary Figure 6:** TG-18 hydrogel does not compromise the therapeutic efficacy of TA *in vitro*.

(a) TNF- $\alpha$  secretion and (b) IL-10 secretion from LPS stimulated human macrophages incubated in a transwell plate in medium (Medium) or in medium with 100  $\mu$ l blank hydrogel (Gel), 100  $\mu$ l TA-loaded hydrogel (Gel + Drug), DMSO (equivalent to 100  $\mu$ l Gel) or free TA (Drug, equivalent to 100  $\mu$ l Gel + Drug) added to the upper

chamber of the transwell. Following 24 h incubation, supernatant was assayed for TNF- $\alpha$  and IL-10 levels by ELISA, and normalized to the levels obtained for cells incubated with medium only. *P* values were determined by one-way Anova with Tukey's post hoc analysis. Data are means  $\pm$  SD for technical repeats (n = 3, performed at least twice).

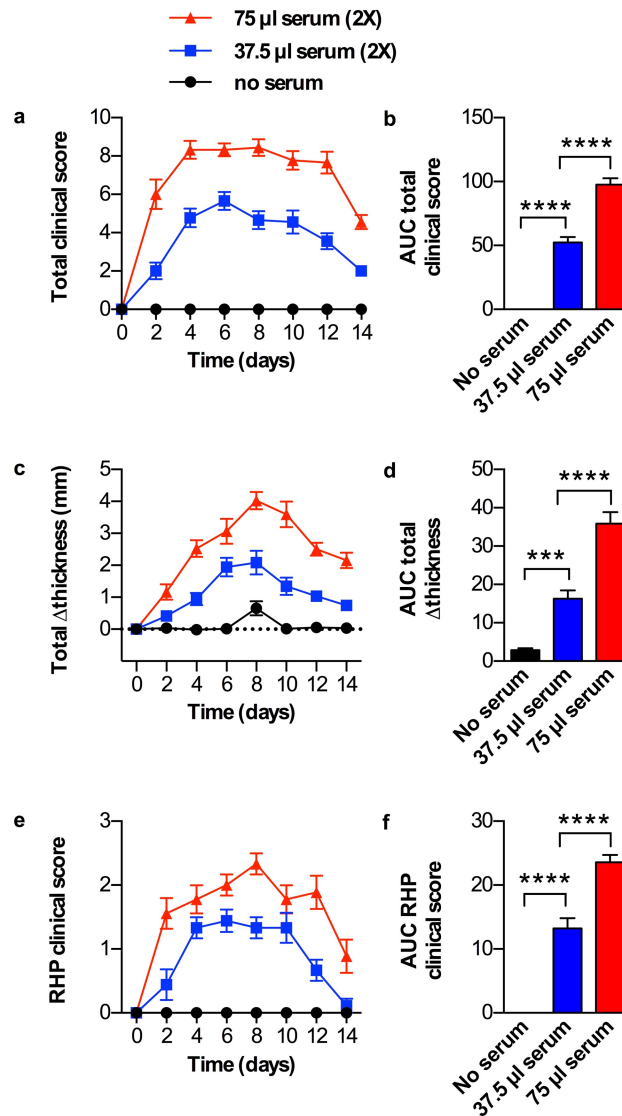

**Supplementary Figure 7: Two doses of 75 µl K/BxN serum resulted in more severe arthritis than two doses of 37.5 µl serum. (a,b)** Total clinical score curves and their AUCs (\*\*\*\* $P<0.0001$ ). **(c,d)** Change in total paw thickness curves and their AUCs (\*\*\* $P<0.001$  and \*\*\*\* $P<0.0001$ ). **(e,f)** RHP clinical score curves and their AUCs (\*\*\*\* $P<0.0001$ ).  $P$  values were determined by one-way Anova with Tukey's post hoc analysis. Data are means  $\pm$  SEM ( $n = 6$  mice/group, experiment performed twice).

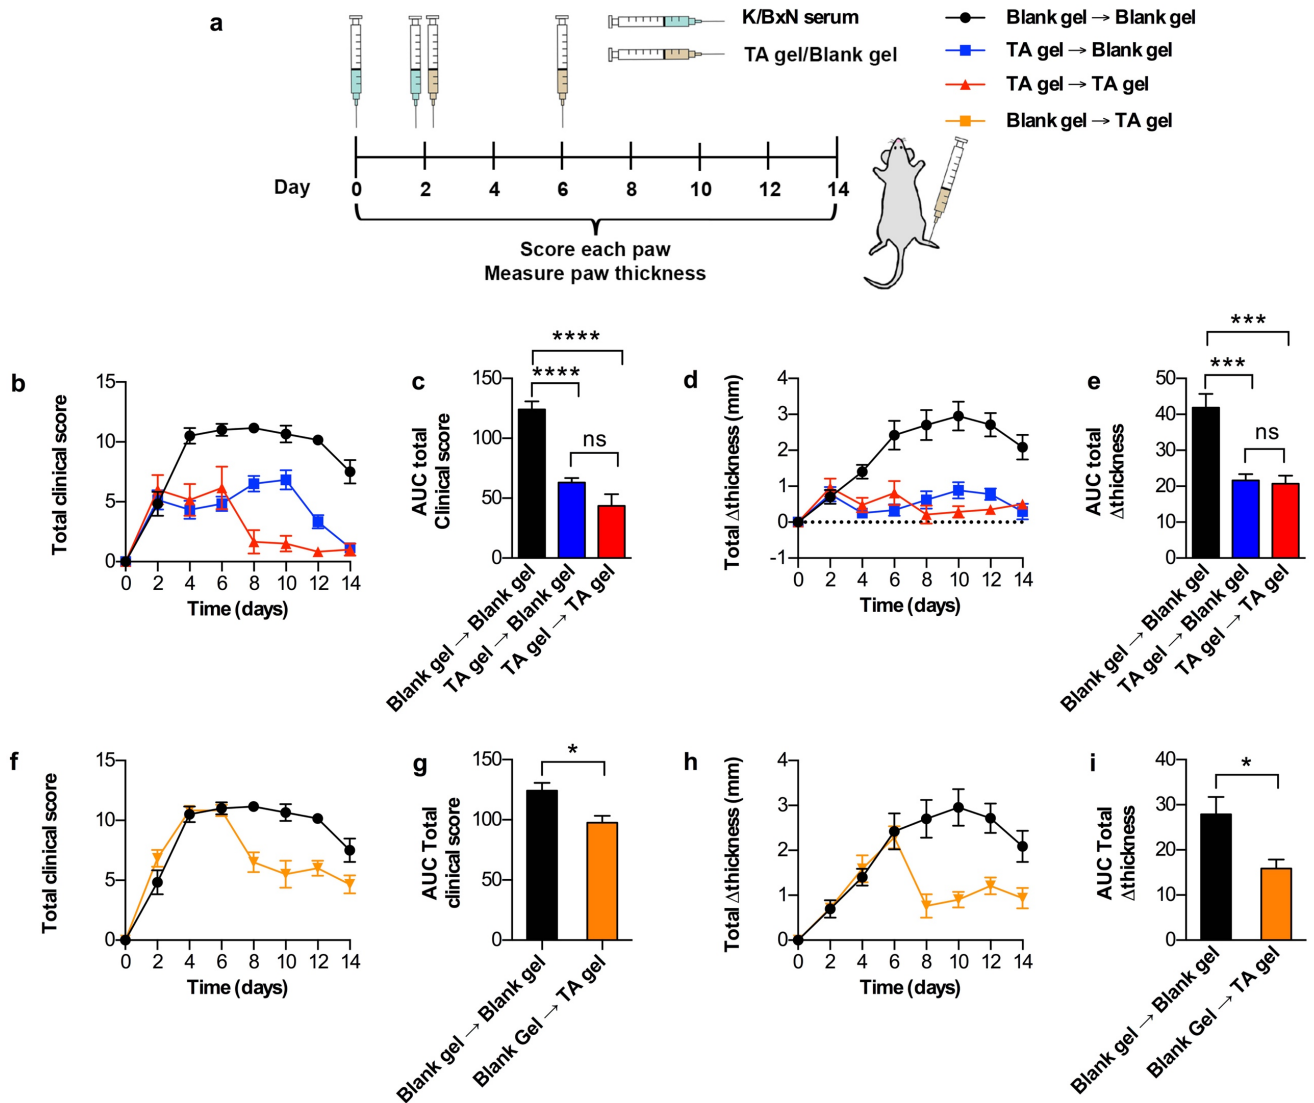

**Supplementary Figure 8: Local delivery of TA loaded TG-18 hydrogel demonstrates therapeutic efficacy in severe arthritis: effect of dosing regimen. (a)** Experimental outline: Arthritis was induced by i.p. injections of 75 µl KBx/N serum on day 0 and day 2. Immediately after the second dose of K/BxN serum, animals were randomized into four groups. (Blank gel → Blank gel) group received blank hydrogel (4 µl) on day 2 and 6, (TA gel → Blank gel) group received TA-loaded TG-18 hydrogel (20 mg TA/ml, 4 µl) on day 2 and blank hydrogel on day 6, (TA gel → TA gel) group received two doses of TA-loaded TG-18 hydrogel – one on day 2 and another on day 6 and (Blank gel → TA gel) group received blank hydrogel on day 2 and TA-loaded TG-18 hydrogel on day 6. Treatments were injected into the right hind paw. Every other day, arthritis severity was scored clinically and paw swelling was measured with calipers. **(b,c)** Total clinical score curves and their AUCs for (Blank gel → Blank gel), (TA gel → Blank gel) and (TA gel → TA gel) (\*\*\*\*P<0.0001). **(d,e)** Change in AUCs for (Blank gel → Blank gel), (TA gel → Blank gel) and (TA gel → TA gel) (\*\*\*\*P<0.0001). **(f,g)** Total clinical score curves and their AUCs for (Blank gel → Blank gel) and (Blank gel → TA gel) (\*P<0.05). **(h,i)** Change in AUCs for (Blank gel → Blank gel) and (Blank gel → TA gel) (\*P<0.05).

total paw thickness curves and their AUCs for (Blank gel → Blank gel), (TA gel → Blank gel) and (TA gel → TA gel) ( $***P<0.001$ ). **(f,g)** Total clinical score curves and their AUCs for (Blank gel → Blank gel), (TA gel → Blank gel) and (Blank gel → TA gel) ( $*P<0.05$ ). **(h,i)** Change in total paw thickness curves and their AUCs for (Blank gel → Blank gel), (TA gel → Blank gel) and (Blank gel → TA gel) ( $*P<0.05$ ). For (c,e),  $P$  values were determined by one-way Anova with Tukey's post hoc analysis and for (g,i),  $P$  values were determined by Student's  $t$  test. Data are means  $\pm$  SEM ( $n = 6$  mice per group).
